# Supplementary material
Source: PubMed Central journal article supplement (PMC9440754)
Supplement: develop-149-200642-s1.pdf [file develop-149-200642-s1.pdf]

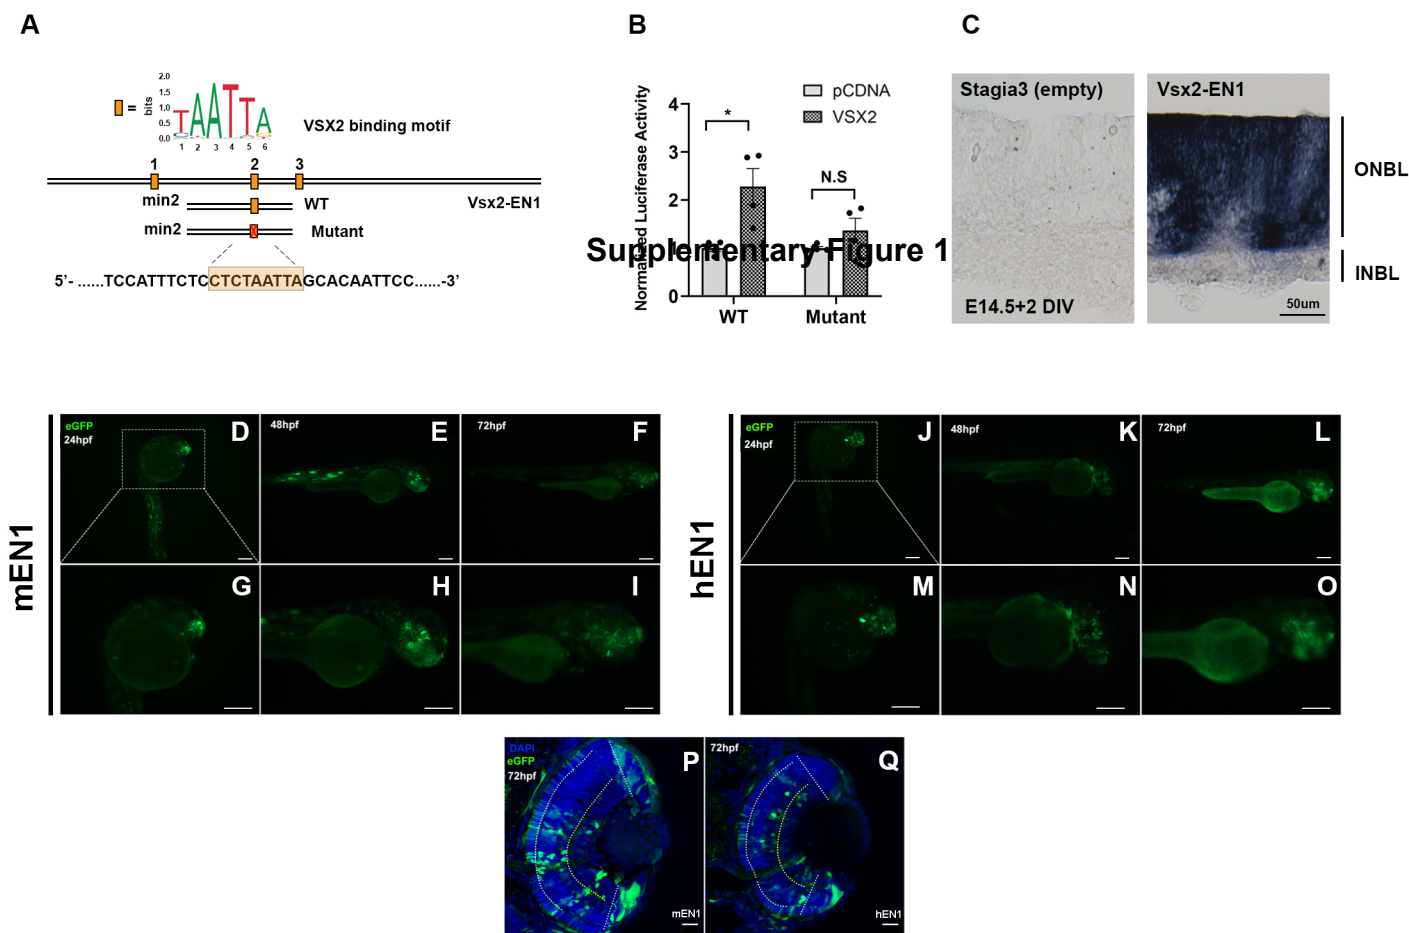

**Fig. S1.** A, Schematic showing the VSX2 predicted binding sites, min2 enhancer, and its deletion regions within the Vsx2-EN1. The highlighted sequence represents nucleotides that have been deleted. B, Luciferase assays of mouse min2 WT and min2 Mutant in the presence of VSX2. Data were shown as mean  $\pm$  S.E.M,  $n = 4$ ,  $P < 0.001$  (\*\*\*) ;  $P < 0.01$  (\*\*);  $P < 0.05$  (\*). C, AP staining in the cross-section of the retinas electroporated with empty or Vsx2-EN1 enhancer cloned in Stagia3 reporter construct. D- O, Whole-mount images of zebrafish embryos at the indicated stages after injection of mouse (D-I) and human (J-O) Vsx2-EN1 enhancer. P- Q, Cross sections of the developing zebrafish retina 72 hpf after injection with the constructs. Panels H, N and P are shown in the main figures.

### Supplementary Figure 2

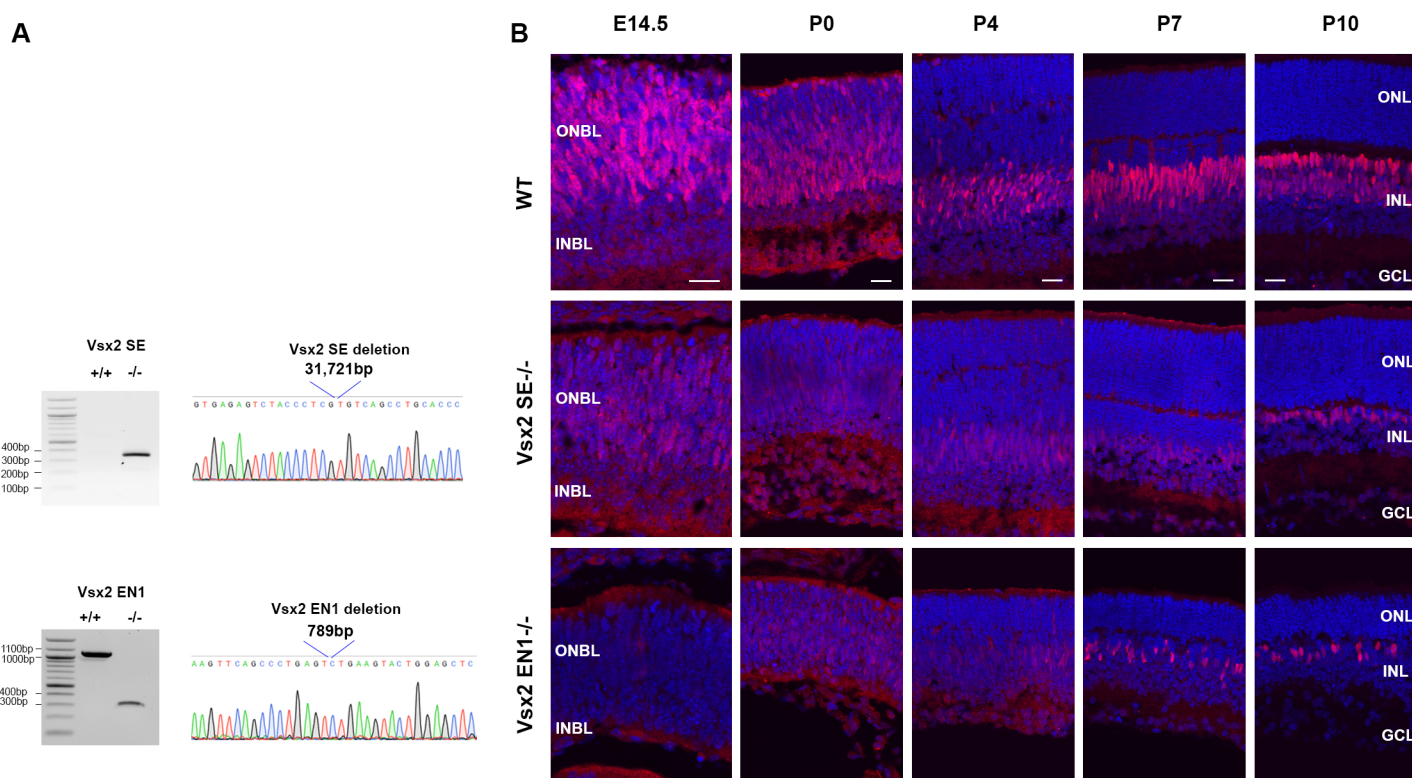

**Fig. S2.** A, Representative genotyping data (gel images of PCR products and sanger sequencing tracks) from *Vsx2*-EN1 and *Vsx2*-SE mouse lines. The deletion boundaries and sizes were indicated above each sequence track. B, Retinal cryosections at different developmental stages (E14.5, P0, P4, P7, P10) from WT, *Vsx2*-SE, and *Vsx2*-EN1 deficient mice immunoassayed with VSX2 antibody.

### Supplementary Figure 3

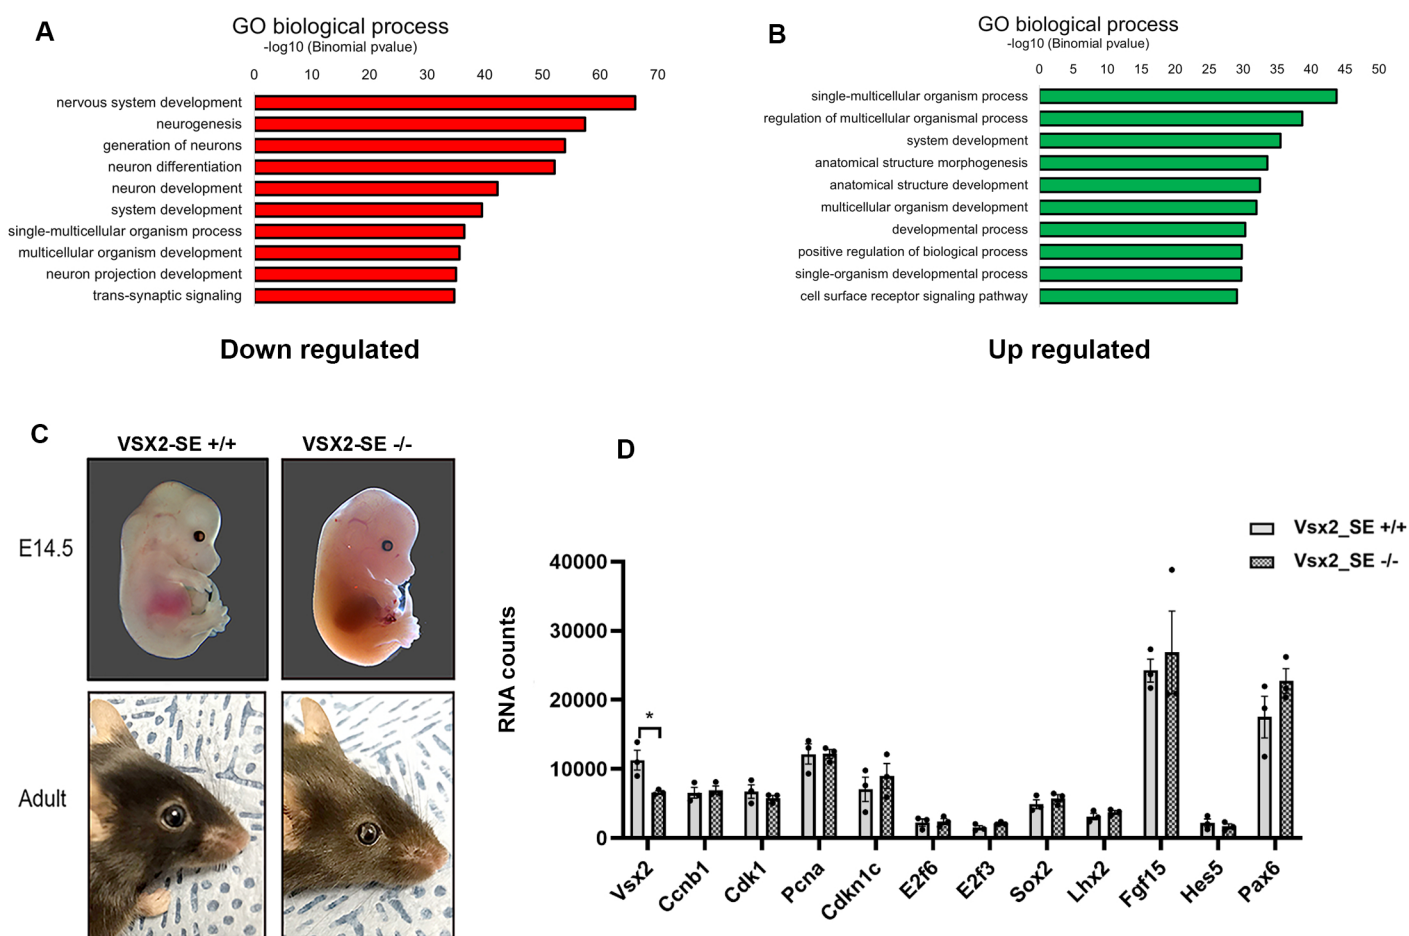

**Fig. S3.** A-B, Results of Gene Ontology (GO) enrichment analysis of downregulated (A) and up-regulated (B) genes in VSX2-EN1 KO mice at E14.5 retina. The lengths of the bars indicate the  $-\log_{10}$ -transformed P-values. Data were generated by Database for Annotation, Visualization, and Integrated Discovery (DAVID) software. C, VSX2-SE KO mice exhibit normal eye size compared to WT mice. D, Bar plot of RNA levels of selected RPC genes as determined by RNA-Seq analysis performed on VSX2-SE $^{-/-}$  and WT retinæ at E14.5. Noticed that only *Vsx2* is significantly downregulated.

### Supplementary Figure 4

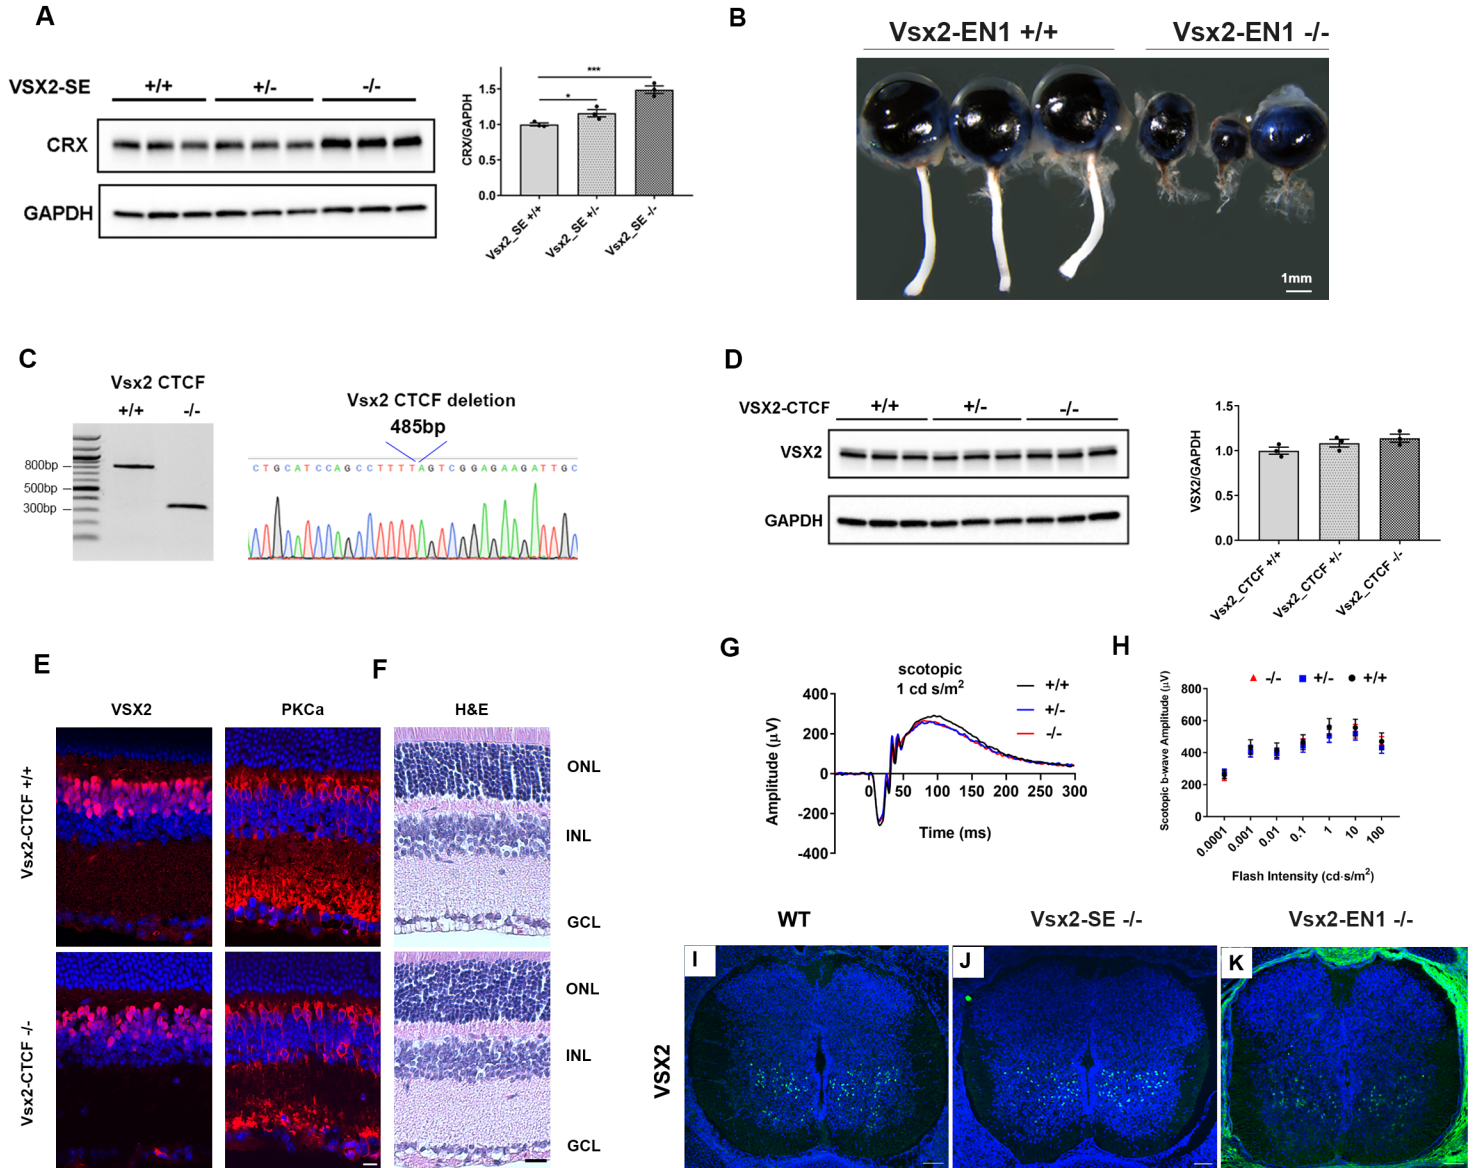



**Fig. S4.** A Western blot analyses of CRX performed on adult retinae from VSX2-SE<sup>-/-</sup>, heterozygous, and WT littermates with quantification. B, Adult eyes from VSX2-EN1 deficient mice are microphthalmic and exhibit optic nerve aplasia. C, Representative gel image of PCR products and sanger sequencing tracks from Vsx2-CTCF mouse lines. D, Analysis of Vsx2 expression in adult Vsx2-CTCF<sup>-/-</sup>, heterozygous and WT littermates by Western blot with quantification. E, Immunohistochemistry of VSX2 and PKCa of the adult retina from Vsx2-CTCF<sup>-/-</sup> and littermate control. F, Hematoxylin and Eosin (H&E) staining of adult Vsx2-CTCF<sup>-/-</sup> retina and control littermates. G-H, ERG was recorded from different groups of mice at 6 weeks of age. Scotopic ERG responses from different groups of mice stimulated by a flash of light at 1 cd·s/m<sup>2</sup> (G) and plots of scotopic b- wave amplitudes (H) did not show any change in different groups (data were shown as mean ± S.E.M, n = 3, *P* < 0.05 (\*)). I-K, Immunostaining of VSX2 on cryosections from WT (I), VSX2-SE<sup>-/-</sup> (J), and VSX2-EN1<sup>-/-</sup> (K) of the developing spinal cord at E14.5. Note that VSX2 remains expressed in the ventral spinal cord in VSX2 enhancer knockouts (scale bar 80 μm).

**Table S1. Genomic coordinates (mm10) of VSX2 ChIP-Seq peaks in E14.5 and adult mouse retina**

[Click here to download Table S1](#)

**Table S2. Genomic coordinates (mm10) of VSX2 ChIP-Seq peaks near photoreceptors and bipolar genes in adult retina**

[Click here to download Table S2](#)

**Table S3. RNA-Seq data from VSX2-EN1 knockout retina at E14.5**

[Click here to download Table S3](#)

**Table S4. RNA-Seq data from VSX2-SE knockout retina at E14.5**

[Click here to download Table S4](#)

**Table S5. Genomic coordinates (hg38) of VSX2 ChIP-Seq peaks in adult human retina, and lists of photoreceptor and bipolar genes with VSX2 peaks**

[Click here to download Table S5](#)

**Table S6.** Primer sequences for genotyping

| Primer Name  | Forward Primer 5'-3'            | Reverse Prime 5'-3'           | PCR size (bp) |               |
|--------------|---------------------------------|-------------------------------|---------------|---------------|
|              |                                 |                               | no deletion   | with deletion |
| VSX2-SE-homo | GCTCTGACCTTCCTGGAAGCC<br>CGC    | CTCAGGAGGTTACAAGGAG<br>GTGTAG | none          | 300           |
| VSX2-SE-Het  | CATAACTGGCTGTATTCTGTG<br>TGACTC | CTTACATCCTTTGACCCTGG<br>CTATG | 149           | none          |
| VSX2-EN1     | GGCCAGGTAGGCCAAAGTAG            | GTGTTCGTACCTCAGTCACCG         | 1091          | 302           |
| VSX2-CTCF    | TGTGGCTCTCTGGAAGATGC            | GGCGCGGAAATGAATGC             | 817           | 330           |

**Table S7.** Primer sequences for cloning

| Name                        | Forward Primer                             | Reverse Primer                         |
|-----------------------------|--------------------------------------------|----------------------------------------|
| mVsx2                       | GCCGGATCCGCCACCATGACGGGGAAAGC<br>GGGGGAAG  | GCCTCTAGA<br>CTAAGCCATGTCCTCCAGCTG     |
| mPAX6                       | GCCGGATCCGCCACC<br>ATGCAGAACAGTCACAGCGG    | GCCTCTAGA<br>TACTGTAATCGAGGCCAGTAC     |
| hVsx2                       | GCCGGATCCGCCACCATGACGGGGAAAGC<br>AGGGGAAG  | GCCTCTAGA<br>CTAAGCCATGTCCTCCAGCTG     |
| hPax6                       | GCCGGATCCGCCACC<br>ATGCAGAACAGTCACAGCGG    | GCCTCTAGA<br>TACTGTAATCTTGGCCAGT       |
| mVsx2_En1                   | GCCGATATCCCTTCCCACCTTTTGTCTGGT<br>A        | GCCAAGCTTTGTGCTCGTCGAGG<br>GTAGACT     |
| mVsx2_En2                   | GCCGATATCCCCGGGCTTAGAGAGCATT               | GCCAAGCTTCAGGCACTTCCCAA<br>GGAGAG      |
| mVsx2_En1_mi<br>n2_WT       | GCCGATATCTTCTGCTTTGTCCCCACCAG<br>T         | GCCAAGCTTAGGGAATGGCTCTC<br>TTTGAT      |
| mVsx2_En1_mi<br>n2_mutation | GTCCATTTCTCGCACAATTCC                      | GGAATTGTGCGAGAAATGGAC                  |
| hVsx2_En1                   | GCCGATATCTTGTCTATGCCTAAAGAGGC<br>CA        | GCCAAGCTTTTCTAGGGCAGAATT<br>CACTCACG   |
| hVsx2_En2                   | GCCGATATCGAGAAGCCTGAGGTTTAGCG<br>ATT       | GCCAAGCTTCTCCACAAGCATGA<br>TCCTACTGA   |
| mOTX2                       | GCCGGATCCGCCACCATGATGTCTTATCT<br>AAAGCAACC | GCCTCTAGATCACAAAACCTGGA<br>ATTTCC      |
| mPrdm1_En                   | GCCCTCGAGAGCCCTGACAAAGAGAGTGG<br>GAG       | GCCGATATCGTCGACACAAAAGC<br>TGAGCTTTGAG |

**Table S8.** Antibodies used in western blots and immunoprecipitation

| Antibody | Company      | Catalog number | Dilution                 |
|----------|--------------|----------------|--------------------------|
| CRX      | Santa Cruz   | Sc-377207      | 1:500                    |
| GAPDH    | ThermoFisher | MA5-15738      | 1:1000                   |
| PRDM1    | Santa Cruz   | SC47732X       | 1:500                    |
| PAX6     | Active Motif | 61611          | 1:1000 (3 $\mu$ l in IP) |
| PAX6     | Santa Cruz   | Sc-81649       | 1:200                    |
| VSX2     | Exalpha      | X1180P         | 1:1000 (3 $\mu$ l in IP) |
| VSX2     | Santa Cruz   | SC-365519X     | 1:1000                   |
| OTX2     | R & D        | AF 1979        | 1:1000 (3 $\mu$ l in IP) |

**Table S9.** Antibodies used in immunostaining

| Antibody      | Company       | Catalog number | Dilution |
|---------------|---------------|----------------|----------|
| PKC $\alpha$  | Santa Cruz    | SC8393         | 1:100    |
| SOX9          | Millipore     | AB5535         | 1:100    |
| VSX2          | Exalpha       | X1180P         | 1:300    |
| VSX2          | Santa Cruz    | SC-365519 X    | 1:500    |
| Brn3a         | Millipore     | MAB1585        | 1/100    |
| Calbindin     | Sigma Aldrich | C9848          | 1/100    |
| Cone Arrestin | Millipore     | AB15282        | 1/300    |
| Pax6          | BioLegend     | 901302         | 1/300    |
| Pax6          | Active Motif  | 61611          | 1/300    |
| Ki-67         | Invitrogen    | MA5-14520      | 1/100    |
| OTX2          | R & D         | AF 1979        | 1:300    |
